1        **Significant phylogenetic signal is not enough to trust phylogenetic predictions**

2            Rafael Molina-Venegas<sup>1,2\*</sup>, Ignacio Morales-Castilla<sup>2</sup> and Miguel Á. Rodríguez<sup>2</sup>

3

4            1. *Department of Ecology, Faculty of Sciences, Universidad Autónoma de Madrid, Madrid, Spain.*

5            2. *Universidad de Alcalá, Department of Life Sciences, Global Change Ecology and Evolution*  
6            *Group, Alcalá de Henares, Madrid, Spain.*

7            \* Correspondence: rafmolven@gmail.com

8

9            Arising from A. Cantwell-Jones et al. *Nature Plants* <https://doi.org/10.1038/s41477-022-01100-6> (2022)

10

11        **Abstract**

12        In a recent study, Cantwell-Jones et al. (2022) proposed a list of 1044 species as  
13        promising key sources of B vitamins based primarily on phylogenetic predictions. To  
14        identify candidate plants, they fitted lambda models of evolution to edible species with  
15        known values in each of six B vitamins (232 to 280 species) and used the estimated  
16        parameters to predict B-vitamin profiles of edible plants lacking nutritional data (6460  
17        to 6508 species). The latter species were defined as potential sources of a B vitamin if  
18        the predicted vitamin content was  $\geq 15\%$  towards recommended dietary allowances for  
19        active females between 31-50 years per 100 g of fresh edible plant material consumed.  
20        Unfortunately, the reliability of the predictions that informed the list of candidate  
21        species is questionable due to insufficient phylogenetic signal in the data (Pagel's  $\lambda$   
22        between 0.171 and 0.665) and a high incidence of species with missing values (over  
23        95% of all the species analyzed in the study). We found that of the 1044 species  
24        proposed as promising B-vitamin sources, 626 to 993 species showed accuracies that  
25        were indistinguishable from those obtained under a white noise model of evolution (i.e.  
26        random predictions conducted in absence of any phylogenetic structure) in at least one

27 of the vitamins, which proves the weakness of the inference drawn from imputed  
28 information in the original study. We hope this commentary serves as a cautionary note  
29 for future phylogenetic imputation exercises to carefully assess whether the data meet  
30 the requirements for the predictions to be valuable, or at least more accurate than  
31 expected by chance.

32

### 33 **Main**

34 In a recent study, Cantwell-Jones et al.<sup>1</sup> proposed a list of 1044 species as promising  
35 key sources of B vitamins based primarily on phylogenetic predictions. To identify  
36 candidate plants, they fitted lambda models of evolution to edible species with known  
37 values in each of six B vitamins and used the estimated parameters to predict B-vitamin  
38 profiles of edible plants lacking nutritional data. The latter species were defined as  
39 ‘sources’ of a B vitamin if the predicted vitamin content was  $\geq 15\%$  towards  
40 recommended dietary allowances for active females between 31–50 years per 100 g of  
41 fresh edible plant material consumed. This phylogenetic imputation exercise is exciting  
42 and inspiring, more so as it would have the potential to be replicated for further goals  
43 such as, for example, identifying species of pharmaceutical interest. Unfortunately, the  
44 predictions from this study are questionable. The predictive capability of lambda  
45 models is primarily determined by the amount of phylogenetic signal in the known data  
46 (i.e. the extent to which closely related species share similar values in the trait of  
47 interest), which means that predictions based on low phylogenetic signals, even if  
48 statistically significant, are typically valueless<sup>2-4</sup>. Further, simulations have shown that  
49 even under ‘strong’ phylogenetic signal (i.e. Pagel’s  $\lambda = 1$ ), acceptable predictions can  
50 only be expected when the most recent common ancestor (MRCA) of a target species  
51 and its closest relative with known trait value (hereafter ‘predictive MRCA’) is

52 relatively recent<sup>4</sup>. As such, the older the predictive MRCAs, the lesser the difference  
53 between phylogenetic imputations and random predictions (Fig. 1). Based on 232 to 280  
54 nutritionally known species (observed data), Cantwell-Jones et al.<sup>1</sup> predicted B-vitamin  
55 profiles for 6460 to 6508 nutritionally unknown species (over 95% of all the species  
56 analyzed in the study), and they did so relying on very weak-to-moderate phylogenetic  
57 signals in the observed data (Pagel's  $\lambda$  between 0.171 and 0.665). These figures suggest  
58 that the predictions conducted by the authors are unreliable due to both insufficient  
59 phylogenetic signal and a high incidence of relatively old predictive MRCAs (Fig. 1).  
60 Moreover, the unreliability of their predictions calls into question the proposed list of  
61 1044 species as promising sources of B vitamins.

62 Cantwell-Jones et al.<sup>1</sup> conducted leave-one-species-out cross-validation trials on  
63 the observed values of the B vitamins they analyzed (they referred to this procedure as  
64 “jackknifing”) and estimated 95% confidence intervals (CI) around each re-estimated  
65 (predicted) value. They found that  $\geq 91.4\%$  of nutritionally known species had measured  
66 (observed) values within the 95% CI of the values predicted in the trials. Here, we  
67 conducted the same analysis but randomizing the authors' dataset in a two-step  
68 procedure. First, the observed values of each vitamin were reshuffled across the species  
69 with known value in the vitamins 500 times, and then each reshuffled set ( $n = 500$  sets  
70 per vitamin) was checked to show complete lack of phylogenetic signal (i.e.  $\lambda < 0.001$   
71 and  $p > 0.05$ ). Otherwise, the values were reshuffled iteratively until the conditions  
72 were met. We found that  $\geq 92.8\%$  of the observed values in the randomized sets sit  
73 within 95% CIs of their corresponding predicted values (Supplementary Data 1-5). This  
74 demonstrates that the authors simply found the null expectation of the analysis, which  
75 deems the CI-based evidence of their study as invalid.

76 On the other hand, the authors used generalised least squares models (with a  
77 variance structure in the error term) to test the strength of the relationship between  
78 predicted and observed values, and they found significant relationships for all the  
79 vitamins. Here, we used a simple and more intuitive prediction coefficient ( $P^2$ ) to assess  
80 the overall predictive power of the lambda models they employed:

$$81 \quad P^2 = 1 - \frac{\sum_{i=1}^n (\hat{y}_i - y_i)^2 / n}{s_y^2}$$

82 where  $\hat{y}_i$  and  $y_i$  are respectively the predicted and observed value for the nutritionally  
83 known species  $i$  and  $s_y^2$  is the sample variance of the observed values of the trait<sup>4,6</sup>.  $P^2$   
84 can be interpreted similarly as Ezekiel's adjusted coefficient of determination<sup>7</sup>, so that  
85  $P^2 = 1$  when all predictions perfectly match the observations and  $P^2 = 0$  when the model  
86 is no better in predicting values than simply taking the mean of the observed values  
87 (note that  $P^2$  has no negative boundary, as there is no theoretical limit to how badly a  
88 model can predict observed trait values). We found that  $P^2$  was close to zero in all cases  
89 except for folate, which showed a slightly higher (yet weak) score (Table 1). This is not  
90 surprising, as previous simulations have shown that phylogenetic predictions perform  
91 very poorly when  $\lambda$  is lower than  $\sim 0.6^4$ . There are numerous studies that caution against  
92 using phylogenies alone to predict missing data under low phylogenetic signal<sup>2-4,8,9</sup>, yet  
93 none of them was acknowledged in Cantwell-Jones et al.<sup>1</sup>

94 In line with the authors' observation that "median differences between predicted  
95 and observed values for each nutrient were <33% of the standard deviation across  
96 species", it could be argued that some of the predictions may still be useful despite the  
97 discouraging results from the leave-one-species-out cross-validation trials (Table 1).  
98 Thus, we used the method described in Molina-Venegas et al.<sup>4</sup> to assess the expected  
99 species-level accuracy of the predictions that informed the list of candidate plants (see  
100 Supplementary Information for details). Depending on whether  $p$ -values were

101 Bonferroni-corrected ( $n = 1616$ , two-sample Wilcoxon tests) and the nominal alpha  
102 criterion (5% or 0.1%), we found that of the 1044 species proposed as promising B-  
103 vitamin sources, 626 to 993 species showed accuracies that were indistinguishable from  
104 those obtained under a ‘white noise’ model of evolution (i.e. random predictions  
105 conducted in absence of any phylogenetic structure) in at least one of the vitamins  
106 (Supplementary Data 6). Moreover, regarding the species that showed statistically  
107 significant accuracies, it should not be concluded that their predictions are necessarily  
108 valuable, only that they are better than drawing values at random independently of the  
109 phylogeny. This is illustrated by the rather modest maximum accuracy that was  
110 recorded across all candidate species and B vitamins analyzed, which corresponded to  
111 *Hordeum bulbosum* and niacin with only 54.4% of  $P^2_{\text{sim}}$  values  $\geq 0.75$  (Supplementary  
112 Data 7). These results are not surprising either. The extremely high incidence of missing  
113 values in the dataset makes predictive MRCAs prone to be relatively old (Fig. 1), which  
114 has a proven negative impact on prediction accuracy<sup>4,8</sup>. As such, simulations show that  
115 only species whose predictive MRCA is younger than ~10% of the height of the  
116 phylogeny are expected to show consistently accurate predictions (i.e. at least 75% of  
117  $P^2_{\text{sim}}$  values  $\geq 0.75$ ) under a scenario of ‘strong’ phylogenetic signal (i.e.  $\lambda = 1$ )<sup>4</sup>.

118 It is very exciting to see a burgeoning interest in connecting phylogenetic  
119 information with human well-being, but researchers should be clear on the limitations of  
120 phylogenetic predictive methods and utilize imputed information with caution and  
121 restraint, especially if the goal is employing individual predictions separately (e.g. to  
122 evaluate if a species has potential to be ‘source’ of a B vitamin, as in Cantwell-Jones et  
123 al.<sup>1</sup>). The dataset gathered by Cantwell-Jones et al.<sup>1</sup> is impressive, and it would not be  
124 surprising if the 1044 species they proposed as candidate sources attract the attention of  
125 professionals willing to invest resources in measuring their B-vitamin content.

126 Unfortunately, the reliability of the predictions that informed the list of candidate  
127 species ranges between weak to very weak. While the authors did not intend to predict  
128 the exact nutrient content of species but to evaluate if the predicted values were above  
129 or below a certain threshold, the fact that most of their predictions are indistinguishable  
130 from pure randomness proves the weakness of the inference drawn from imputed  
131 information in their study. We hope this commentary serves as a cautionary note for  
132 future phylogenetic imputation exercises to carefully assess whether the data meet the  
133 requirements for the predictions to be valuable, or at least more accurate than expected  
134 by chance.

135

### 136 **Acknowledgements**

137 We thank the Scientific Computation Centre of Andalusia (CICA) for the computing  
138 services they provided. I.M.-C. acknowledges funding from the Spanish Ministry for  
139 Science and Innovation (grant no. PID2019-109711RJ-I00 to I.M.-C.) as well as from  
140 Comunidad de Madrid and Universidad de Alcalá (funders of I.F.W. through grant  
141 CM/BG/2021-003 to I.M.-C.).

142

### 143 **Author contributions**

144 R.M.-V. conceived and discussed the idea with M.A.R. and I.M.-C., performed the  
145 calculations and led the writing, I.M.-C. drew the figure, and all the authors contributed  
146 to the writing.

147

### 148 **Competing Interests**

149 The authors declare no competing interests

150

151 **Additional information**

152 **Supplementary information.** The online version contains supplementary material

153 available at XXX

154

155 **Data availability.** All the datasets generated for this study are available from the

156 Figshare Digital Repository at <https://doi.org/10.6084/m9.figshare.19682880.v1>.

157

158 **Correspondence** should be addressed to R.M.-V.

159

160 **Table 1.** Phylogenetic signal  $\lambda$  of each B vitamin analyzed across  $N$  nutritionally known

161 species and prediction coefficients  $P^2$  derived from the leave-one-species-out cross-

162 validation trials.

163

| <b>B vitamin</b> | <b><math>N</math></b> | <b><math>\lambda</math></b> | <b><math>P^2</math></b> |
|------------------|-----------------------|-----------------------------|-------------------------|
| Thiamine         | 280                   | 0.293                       | -0.010                  |
| Riboflavin       | 277                   | 0.192                       | 0.035                   |
| Niacin           | 278                   | 0.665                       | 0.086                   |
| Pantothenic acid | 232                   | 0.171                       | 0.023                   |
| Folate           | 256                   | 0.302                       | 0.183                   |

164

165 **Figure 1.** Conceptual model on the expected accuracy of phylogenetic predictions as a

166 function of phylogenetic signal and distance to predictive MRCAs, this is, the MRCA

167 of each target species and its closest relative with known trait value. Accuracy is

168 expected to be acceptable only under strong phylogenetic signal and relatively recent

169 predictive MRCAs (short distances), and predictions will be uncertain if any of these

170 conditions are not met. The probability of finding relatively old predictive MRCAs

171 (long distances) increases with the amount of missing data, which may lead to the  
172 worst-case scenario if phylogenetic signal is weak.

173

## 174 **References**

- 175 1. Cantwell-Jones, A. *et al.* Global plant diversity as a reservoir of micronutrients for  
176 humanity. *Nature Plants* 1–8 (2022).
- 177 2. Swenson, N. G. Phylogenetic imputation of plant functional trait databases.  
178 *Ecography* **37**, 105–110 (2014).
- 179 3. Swenson, N. G. *et al.* Phylogeny and the prediction of tree functional diversity across  
180 novel continental settings. *Glob Ecol Biogeogr* **26**, 553–562 (2017).
- 181 4. Molina-Venegas, R. *et al.* Assessing among-lineage variability in phylogenetic  
182 imputation of functional trait datasets. *Ecography* **41**, 1740–749 (2018).
- 183 5. Guénard, G., Legendre, P. & Peres-Neto, P. Phylogenetic eigenvector maps: a  
184 framework to model and predict species traits. *Methods Ecol Evol* **4**, 1120–1131  
185 (2013).
- 186 6. Guénard, G., Ohe, P. C. von der, Walker, S. C., Lek, S. & Legendre, P. Using  
187 phylogenetic information and chemical properties to predict species tolerances to  
188 pesticides. *Proc R Soc B Biol Sci* **281**, 20133239 (2014).
- 189 7. Ezekiel, M. *Methods of correlation analysis*. John Wiley and Sons, New York, USA  
190 (1930).
- 191 8. Johnson, T. F., Isaac, N. J. B., Paviolo, A. & González-Suárez, M. Handling missing  
192 values in trait data. *Glob Ecol Biogeogr* **30**, 51–62 (2021).
- 193 9. Debastiani, V. J., Bastazini, V. A. G. & Pillar, V. D. Using phylogenetic information  
194 to impute missing functional trait values in ecological databases. *Ecol Inform* **63**,  
195 101315 (2021).



Distance to predictive MRCA

Longer ↑  
Shorter ↓

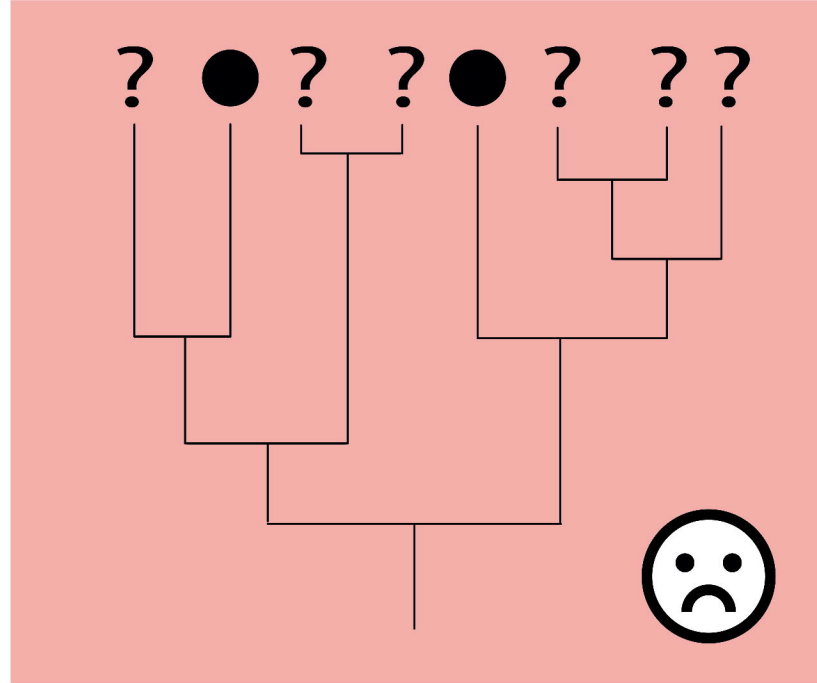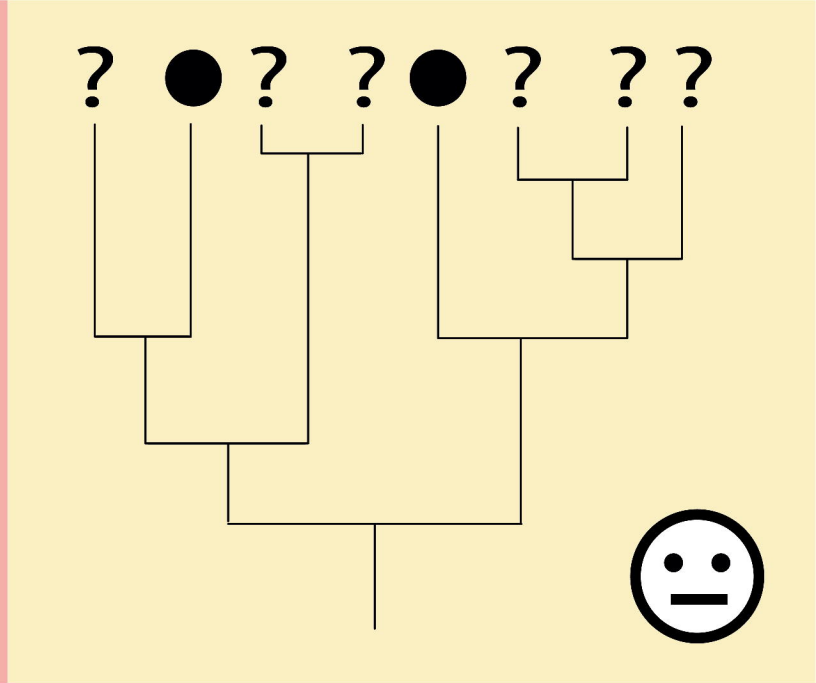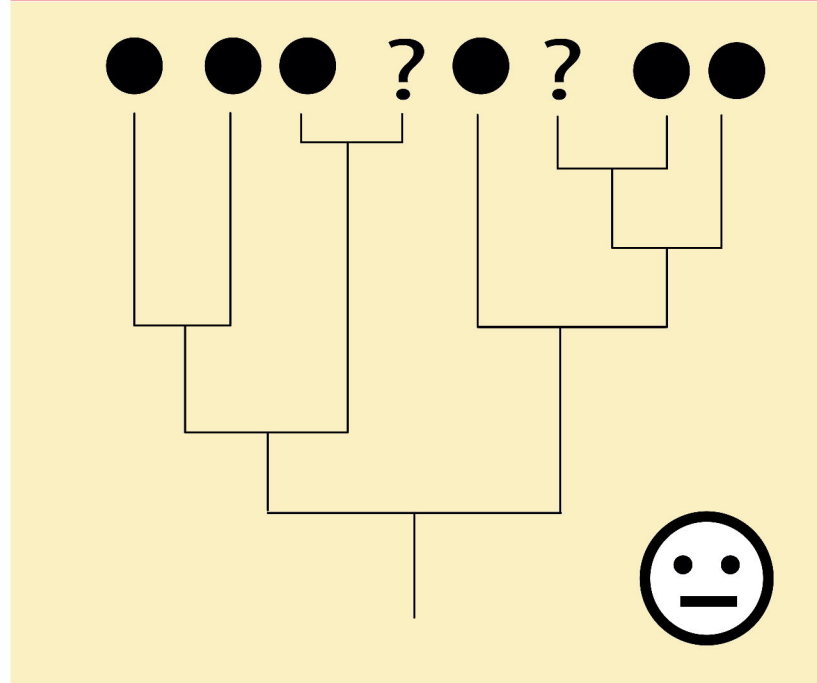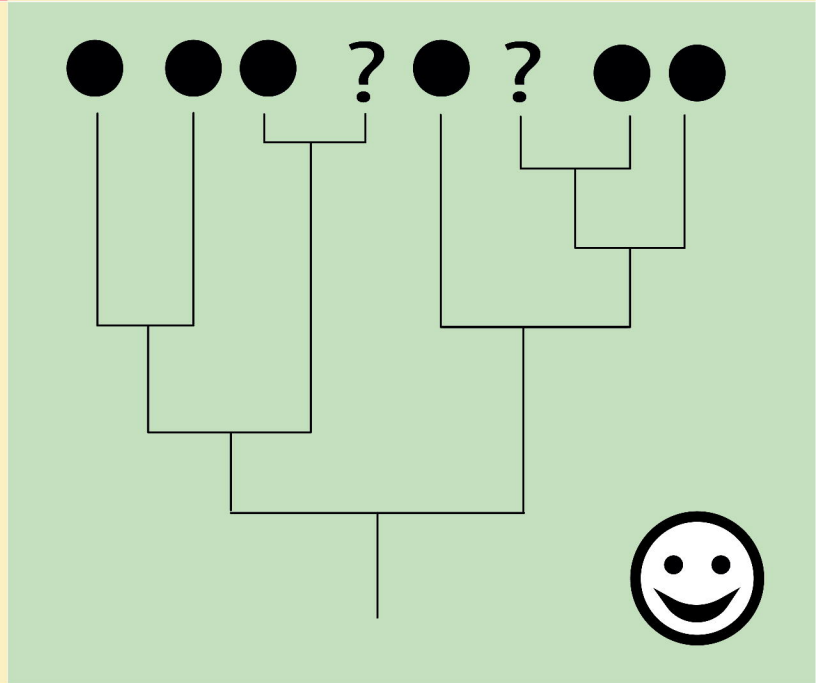

← Weaker Stronger →

Phylogenetic signal
